# Supplementary material
Source: PubMed Central journal article supplement (PMC4285360)
Supplement: NIHMS639283-supplement-Supplementary_data.pdf [file NIHMS639283-supplement-Supplementary_data.pdf]

## **Supplementary data**

**Table S1.** Information and dilution ratio of antibodies

|                                                                                                                   | <b>Catalog no.</b> | <b>Vendor</b>                       | <b>Dilution ratio</b> |
|-------------------------------------------------------------------------------------------------------------------|--------------------|-------------------------------------|-----------------------|
| <b>Primary antibodies</b>                                                                                         |                    |                                     |                       |
| rabbit monoclonal anti-human CD90 IgG antibody                                                                    | ab92574            | abcam, Cambridge, MA                | 1:100                 |
| mouse monoclonal anti-human CD24 IgG antibody                                                                     | ab76514            | abcam, Cambridge, MA                | 1:100                 |
| mouse monoclonal anti-human CD31 IgG antibody                                                                     | ab9498             | abcam, Cambridge, MA                | 1:25                  |
| mouse monoclonal anti-human CD45 IgG antibody                                                                     | ab8216             | abcam, Cambridge, MA                | 1:1000                |
| mouse monoclonal anti-human CD133 IgG antibody                                                                    | MAB4399            | Milipore, Temecula, CA              | 1:100                 |
| <b>HRP-conjugated secondary antibodies</b>                                                                        |                    |                                     |                       |
| goat polyclonal anti-rabbit IgG H&L antibody                                                                      | ab6721             | abcam, Cambridge, MA                | 1:200                 |
| goat polyclonal anti-mouse IgG H&L antibody                                                                       | ab6789             | abcam, Cambridge, MA                | 1:200                 |
| <b>Fluorochrome-conjugated secondary antibodies</b>                                                               |                    |                                     |                       |
| DyLight <sup>®</sup> 488 goat anti-rabbit IgG antibody and DyLight <sup>®</sup> 549 horse anti-mouse IgG antibody | DI-1488            | Vector laboratories, Burlingame, CA | 1:200                 |
|                                                                                                                   | DI-2549            | Vector laboratories, Burlingame, CA | 1:200                 |

Abbreviation: HRP, horseradish peroxidase

**Table S2A.** Mean (S.E.), median, and least square mean of percentage of CD90+ cancer cells/hepatocytes

|                        | <b>Mean (S.E.)</b> | <b>Median (Range)</b> | <b>Least square mean*(S.E.)</b> |
|------------------------|--------------------|-----------------------|---------------------------------|
| <b>Normal liver</b>    | 0.16 (0.06) %      | 0 (0-0.55) %          | 0.64 (1.05) %                   |
| <b>Cirrhosis</b>       | 0.50 (0.16) %      | 0.26 (0-3.07) %       | 0.48 (0.77) %                   |
| <b>Early-stage HCC</b> | 5.01 (0.39) %      | 4.39 (0-14.92) %      | 4.96 (0.43) %                   |
| <b>Late-stage HCC</b>  | 6.68 (0.48) %      | 6.63 (0-17.91) %      | 6.64 (0.39) %                   |

\* adjusted for age and gender

**Table S2B.** Mean  $\pm$  S.E., median, and least square mean of level of CD90 expression on tumor region (OD/area,  $\times 10^{-3} / \mu\text{m}^2$ )

|                        | <b>Mean (S.E.)</b> | <b>Median (Range)</b> | <b>Least square mean*(S.E.)</b> |
|------------------------|--------------------|-----------------------|---------------------------------|
| <b>Normal liver</b>    | 2.5 (0.8)          | 1.0 (0-11.9)          | 9.3 (11.1)                      |
| <b>Cirrhosis</b>       | 23.1 (6.1)         | 9.9 (0.1-97.1)        | 22.0 (8.1)                      |
| <b>Early-stage HCC</b> | 40.7 (4.1)         | 32.2 (2.1-147.7)      | 40.2 (4.6)                      |
| <b>Late-stage HCC</b>  | 52.1 (4.8)         | 38.3 (4.8 -245.8)     | 51.6 (4.1)                      |

\* adjusted for age and gender

**Table S2C.** Mean  $\pm$  S.E., median, and least square mean of level of CD90 expression on stromal region (OD/area,  $\times 10^{-3} / \mu\text{m}^2$ )

|                        | <b>Mean (S.E.)</b> | <b>Median (Range)</b> | <b>Least square mean*(S.E.)</b> |
|------------------------|--------------------|-----------------------|---------------------------------|
| <b>Normal liver</b>    | 37.9 (19.2)        | 3.4 (0.2-167.9)       | 33.0 (64.4)                     |
| <b>Cirrhosis</b>       | 165.4 (33.9)       | 143.8 (13.8-633.3)    | 164.7 (39.0)                    |
| <b>Early-stage HCC</b> | 226.3 (27.1)       | 187.3 (2.7-736.0)     | 227.3 (25.1)                    |
| <b>Late-stage HCC</b>  | 193.9 (21.6)       | 146.1 (0.5-835.3)     | 194.1 (21.5)                    |

\* adjusted for age and gender

**Table S2D.** Mean  $\pm$  S.E., median, and least square mean of level of overall CD90 expression (OD/area,  $\times 10^{-3} / \mu\text{m}^2$ )

|                        | <b>Mean (S.E.)</b> | <b>Median (Range)</b> | <b>Least square mean*(S.E.)</b> |
|------------------------|--------------------|-----------------------|---------------------------------|
| <b>Normal liver</b>    | 5.6 (2.1)          | 1.1 (0-24.0)          | 14.1(18.1)                      |
| <b>Cirrhosis</b>       | 59.4 (11.4)        | 43.1 (1.0-178.8)      | 58.1 (12.9)                     |
| <b>Early-stage HCC</b> | 63.6 (7.5)         | 41.1 (2.1-331.9)      | 62.9 (7.3)                      |
| <b>Late-stage HCC</b>  | 73.9 (6.9)         | 55.3 (6.5-306.9)      | 73.4 (6.6)                      |

\* adjusted for age and gender

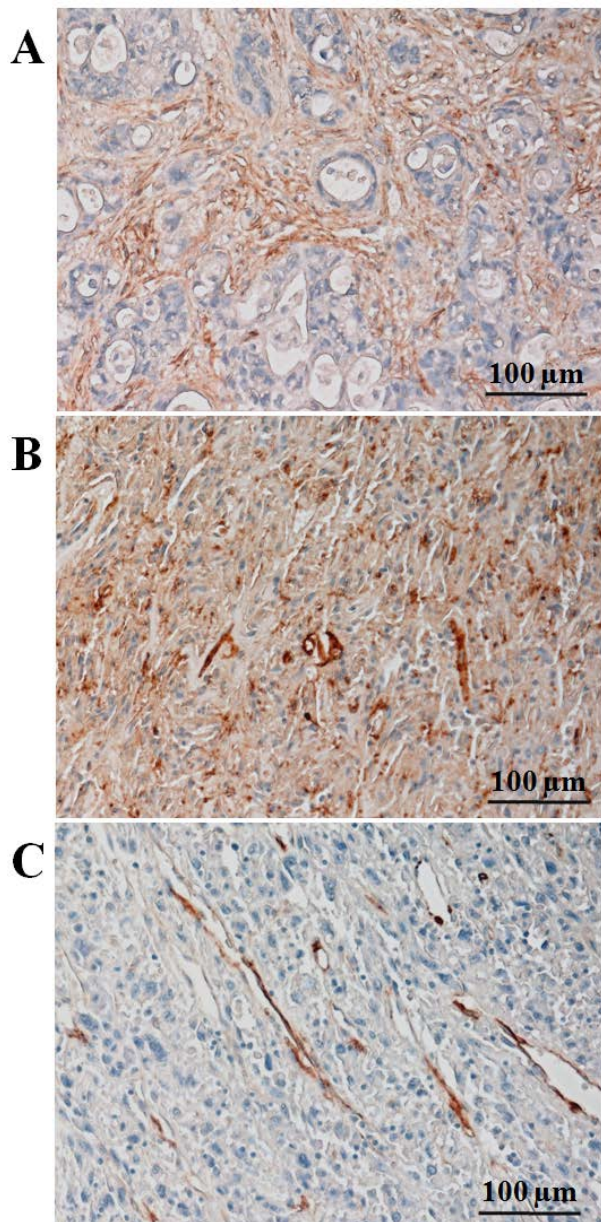

**Figure S1. CD90 expression in non-HCC liver tumors**

- (A) Intrahepatic cholangiocarcinoma. No CD90+ neoplastic cell was observed.
- (B) Hepatic malignant fibrohistiocytoma. Weak expression of CD90 was seen in most of neoplastic cells while few of them showed strong expression.
- (C) Hepatic angiosarcoma. CD90 was expressed intensely in perivascular area.

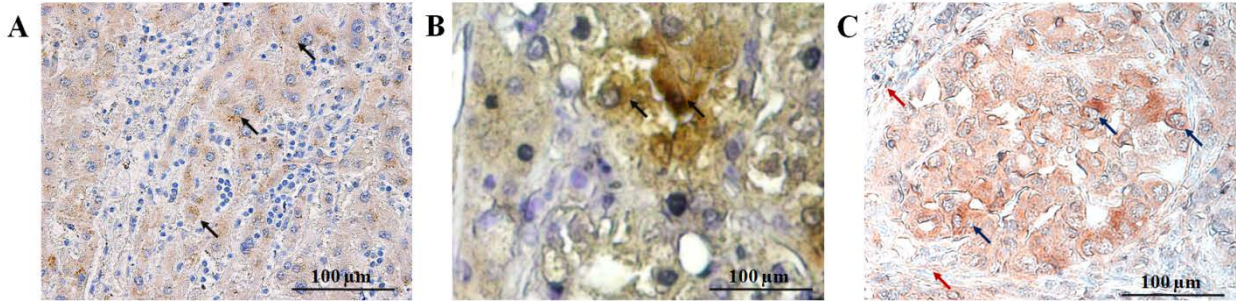

**Figure S2. Expression of CD24 and CD133 in hepatocellular carcinoma**

(A) CD24 expression was found in cytoplasm of neoplastic cells in various levels. Arrows indicated CD24+ cells.

(B) Cytoplasmic expression of CD44 was observed in neoplastic cells in various levels. Arrows indicated CD24+ cells.

(C) Various intensity of CD133 cytoplasmic expression was observed in neoplastic cells. However, some stromal cells also expressed CD133. Red arrows indicated CD133+ stromal cells. CD133+ neoplastic cells were indicated by blue arrows.
